# Supplementary material for: Combinatorial activation and concentration-dependent repression of the Drosophila even skipped stripe 3+7 enhancer
Source: Oxford University Press journal article supplement (doi:10.1242/dev.065987), 2011-08-25
Supplement: dev065987figs1.pdf [file dev065987figs1.pdf]

A

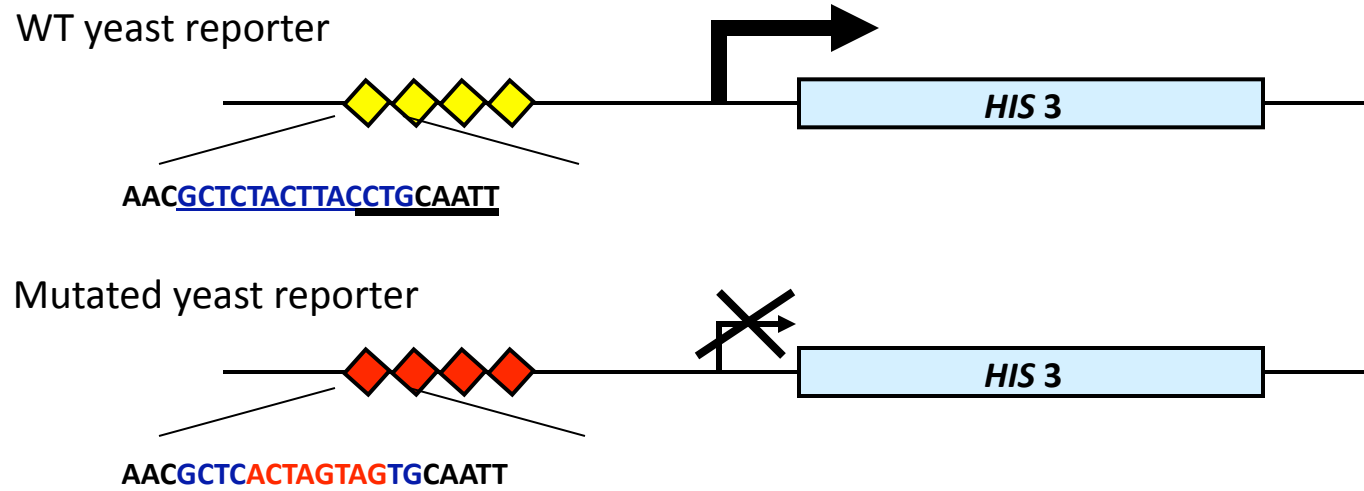

B

|        |                     | Clone #    | Gene              | WT reporter       |                   |                   | Mut reporter    |                   |      |
|--------|---------------------|------------|-------------------|-------------------|-------------------|-------------------|-----------------|-------------------|------|
| [3-AT] |                     |            |                   | 0                 | 10mM              | 45mM              | 0               | 10mM              | 45mM |
|        | 1,2,3,4,5,6,7,17,18 | <i>kni</i> | $3.1 \times 10^3$ | $1.6 \times 10^3$ | $1.2 \times 10^3$ | $3.0 \times 10^3$ | $2 \times 10^3$ | $0.3 \times 10^3$ |      |
|        | 8,10,18             | <i>Zld</i> | $3.8 \times 10^3$ | $1.5 \times 10^3$ | $0.5 \times 10^3$ | $3.0 \times 10^3$ | 0               | 0                 |      |
