# Supplementary material for: Combinatorial activation and concentration-dependent repression of the Drosophila even skipped stripe 3+7 enhancer
Source: Oxford University Press journal article supplement (doi:10.1242/dev.065987), 2011-08-25
Supplement: dev065987figs4.pdf [file dev065987figs4.pdf]

-3880

GGATCCTCGAAATCGAGAGCGACCTCGCTGCATTAGAAAACTAGATCAGTTTTTTGTTTT  
K12 K39 H49

GGCCGACCGATTTTGTGCCCGGTGCTCTCTTTACGGTTTATGGCCGCGTTCCCATTTCC  
K64r H71 K84r K108r

CAGCTTCTTTGTTCCGGGCTCAGAAATCTGTATGGAATTATGGTATATGCAGATTTTTAT  
H174

S198

GGGTCCCGGCGATCCGGTTCGCGGAACGGGAGTGTCCTGCCGCGAGAGGTCTCGCCGGC

GATCCTTGTCGCCCGTATTAGGAAAGTAGATCACGTTTTTTGTTCCATTGTGCGCTTTT  
K264 H275 H297

S319

TTCGTCGCGTAGTTTTTTTCCCGAACCCAGCGAACTGCTCTAATTTTTTAATTCTTCA  
K306r H314 K338r H347

Z413r

CGGCTTTTCATTGGGCTCCTGGAAAAACGCGGACAAGGTTATAACGCTCTACTTACCTGC  
K405r

AATTGTGGCCATAACTCGCACTGCTCTCGTTTTTAAGATCCGTTTGTGTTTGTGTTTGTGTG  
K442r H450

TCCGCGATGGCATTACAGTTTTTACGGAGCTC  
K479r H499

### Legend:

Purple: STAT

Blue: Zelda

Green: Knirps

Red: Hunchback

Brown: overlap between repressors

Orange: overlap between activators and repressors
