# Supplementary material for: Combinatorial activation and concentration-dependent repression of the Drosophila even skipped stripe 3+7 enhancer
Source: Oxford University Press journal article supplement (doi:10.1242/dev.065987), 2011-08-25
Supplement: dev065987tables1.pdf [file dev065987tables1.pdf]

Table S1. Probes and primers

| Name                                                                                                         | Sequence                                   | Binding | Position (nt) |
|--------------------------------------------------------------------------------------------------------------|--------------------------------------------|---------|---------------|
| <b>Zelda gel-shift probe sequences for testing a binding site in the eve 3+7 enhancer (Fig. 2A)*</b>         |                                            |         |               |
| Wild type                                                                                                    | AACGCTCTAC <b>TTACCTG</b> CAATT            | Yes     | 403-424       |
| Mutant                                                                                                       | AACGCTC <b>ACTAGTAG</b> TGCAATT            | No      |               |
| <b>Primers for PCR amplification of eve 2 sequences (Fig. 3F)†</b>                                           |                                            |         |               |
| <b>Fragment 1</b>                                                                                            |                                            |         |               |
| 5' oligo                                                                                                     | GGCAGGAGCGAGGTATCCTTCTG                    | Yes     | -23-129       |
| 3' oligo                                                                                                     | CTGCAATTGACTAATAATCTCGCTG                  |         |               |
| <b>Fragment 2</b>                                                                                            |                                            |         |               |
| 5' oligo                                                                                                     | GTTAATCCGTTTGCCATCAGCGAG                   | Yes     | 88-250        |
| 3' oligo                                                                                                     | CCCTCGATTCCGTCTAAATGAAAG                   |         |               |
| <b>Fragment 3</b>                                                                                            |                                            |         |               |
| 5' oligo                                                                                                     | TTTAGACGGAATCGAGGGACCCTG                   | Yes     | 233-382       |
| 3' oligo                                                                                                     | GGATTCCAAGTCAAGCCCTTGGC                    |         |               |
| <b>Fragment 4</b>                                                                                            |                                            |         |               |
| 5' oligo                                                                                                     | GCCAAGGGCTTGACTTGGAATCC                    | Yes     | 360-513       |
| 3' oligo                                                                                                     | CCGTTAATTGCGTTGCCTGGACC                    |         |               |
| <b>Probe sequences for testing Zelda binding to the eve 2 enhancer (Fig. 3G,H)‡</b>                          |                                            |         |               |
| P32                                                                                                          | TAGCCAAGGGCTTGACTTGGA                      | No      | 358-378       |
| P33                                                                                                          | CTTGGAATCCAATCCCGATCC                      | No      | 373-393       |
| P34                                                                                                          | CGATCCCTAGCCCGATCCCAA                      | No      | 388-408       |
| P35                                                                                                          | TCCAATCCAATCCAATCC                         | No      | 403-423       |
| P36                                                                                                          | CAATCCCTTGCCTTTTTCATT                      | No      | 418-438       |
| P37                                                                                                          | TTCATTAGAAAGTCATAAAAA                      | No      | 433-453       |
| P38                                                                                                          | TAAAAACACATAATAATGATG                      | No      | 448-468       |
| P39                                                                                                          | ATGATGTGCAAGGGATTAGGG                      | No      | 463-483       |
| P40                                                                                                          | TTAGGGGCGCGCAGTCCAGG                       | No      | 478-498       |
| P41                                                                                                          | TC <b>CAGGCAA</b> CGCAATTAACGG             | Yes     | 493-513       |
| P42                                                                                                          | GCGCAGGTCC <b>CAGGCAA</b> CGCAAT           | Yes     | 486-507       |
| P43                                                                                                          | GCGCAGGAGC <b>GAGGTAT</b> CCTTCC           | Yes     | -23 to -2     |
| P44                                                                                                          | CTTCTGGTTAC <b>CCGGTACT</b> GCAT           | Weak    | -6-18         |
| P45                                                                                                          | CGAAAAGCTGGC <b>CTGGTTI</b> CTCGC          | Yes     | 52-75         |
| P46                                                                                                          | CGTGTTAATCCGTTTGCCATCA                     | No      | 85-106        |
| P47                                                                                                          | GTGCGAGTTTGGTAACACGCTG                     | No      | 198-219       |
| P48                                                                                                          | CTTTCATTTAGACGGAATCGAGGG                   | No      | 227-250       |
| P49                                                                                                          | CAGGGCATTCCGCCGATCTAGC                     | No      | 292-313       |
| <b>Knirps gel-shift probe sequences for testing binding sites in the eve 3+7 enhancer (Fig. 4A, Fig. 5)§</b> |                                            |         |               |
| P1                                                                                                           | GACACAAGGATCCTCGAAATC                      | No      | -7-14         |
| P2                                                                                                           | CTCGAA <b>ATCGAGAGC</b> ACCTC              | Yes     | 6-26          |
| P2 M1                                                                                                        | CTCGAA <b>GTCGATAGAG</b> ACCTC             | No      |               |
| P3                                                                                                           | TGCATTAGAA <b>AACTAGATCAG</b>              | Yes     | 29-49         |
| P3 M1                                                                                                        | TGCATTAG <b>CTAGCTAGATCAG</b>              | No      |               |
| P3 M2                                                                                                        | TGCATTAGAA <b>GACTAAATTAG</b>              | No      |               |
| P3 M3                                                                                                        | TGCATTAGAA <b>AACTAAATTAG</b>              | Weak    |               |
| P3 M4                                                                                                        | TGCATTAGAA <b>AACTAAATCAG</b>              | Yes     |               |
| P3 M5                                                                                                        | TGCATTAGAA <b>AACTAGATTAG</b>              | Yes     |               |
| P4                                                                                                           | TCAGTTTTTTGTTTTGGC <b>CGACCGATTT</b> TTGTG | Yes     | 46-78         |
| P4 M1                                                                                                        | TCAGTTTTTTGTTTTGGC <b>CTACAGATT</b> CTTGTG | Yes     |               |
| P4 M2                                                                                                        | TCAGTTTTTTGTTTT <b>AGCTTACAGATT</b> TTTGTG | Yes     |               |
| P5                                                                                                           | GTGCCCGG <b>TGCTCTCTT</b> ACG              | Yes     | 76-96         |
| P5 M1                                                                                                        | GTGCCCGGT <b>ACTATCTT</b> CACG             | No      |               |
| P5 M2                                                                                                        | GTGCCCGGT <b>ACTATCTT</b> ACG              | No      |               |
| P6                                                                                                           | TATGGCCG <b>CGTCCCAT</b> TCC               | Yes     | 100-120       |
| P6 M1                                                                                                        | TATGGCCG <b>CCTAGCCAT</b> TCC              | No      |               |
| P6 M2                                                                                                        | TATGGCCG <b>CATTACCAT</b> TCC              | No      |               |
| P7                                                                                                           | AGCTTCTTTGTTCCGGGCTCA                      | No      | 122-142       |
| P8                                                                                                           | CAGAAATCTGTATGGAATTATG                     | No      | 141-162       |
| P9                                                                                                           | TTATGGTATATGCAGATTTTATGG                   | No      | 158-182       |
| P10                                                                                                          | TTATGGGTCCCGGCGAGTCCGGTTC                  | No      | 177-200       |
| P11                                                                                                          | GGTTCGCGGAACGGGAGTGTC                      | No      | 196-216       |
| P12                                                                                                          | GTGTCCTGCCGCGAGAGTCTCCTCGC                 | No      | 212-236       |
| P13                                                                                                          | CTCGCCGGCGATCCTTGTGCGC                     | No      | 232-252       |
| P14                                                                                                          | TTGT <b>CGCCGAT</b> TAGGA                  | Weak    | 246-263       |
| P14 M1                                                                                                       | TTGT <b>CA</b> CCAGTATTAGGA                | No      |               |
| P15                                                                                                          | CGTATTAGGA <b>AAAGTAGATCAC</b>             | Yes     | 254-274       |
| P15 M1                                                                                                       | CGTATTAG <b>CTAGGTAGATCAC</b>              | No      |               |
| P15 M2                                                                                                       | CGTATTAGGA <b>GAGTATATTAC</b>              | No      |               |

|        |                                         |      |         |
|--------|-----------------------------------------|------|---------|
| P16    | GTAGATCAGTTTTTTGTTC                     | No   | 266-285 |
| P17    | ACGTTTTTTGTTCCATTGTG                    | No   | 273-293 |
| P18    | ATTGTGCGCTTTTTTCGCT                     | No   | 288-306 |
| P19    | TTTTTCGCT <u>IGCGCTAGTTTTT</u>          | Yes  | 298-318 |
| P19 M1 | TTTTTCGCT <u>ACGATAGTCTTT</u>           | No   |         |
| P19 M2 | TTTTTCGCT <u>ACGATAGTTTTT</u>           | No   |         |
| P20    | GCTAGTTTTTTTCCCCGAACC                   | No   | 309-329 |
| P21    | GAACCCAGCGAACT <u>TGCTCTAATT</u>        | Yes  | 325-347 |
| P21 M1 | GAACCCAGCGAACT <u>ACTATAATC</u>         | No   |         |
| P21 M2 | GAACCCAGCGAACT <u>ACTATAATT</u>         | No   |         |
| P22    | TAATTTTTTAATTCTTCACGGCTTTT              | Weak | 343-368 |
| P23    | TTTTATTGGGCTCCTGGAAAAACG                | Weak | 365-389 |
| P24    | AAACGCGGACAAGTTATAACGC                  | No   | 385-407 |
| P25    | AA <u>CGCTCTACTT</u> ACCTGCAATT         | Yes  | 403-424 |
| P25 M1 | AA <u>CACTTACTT</u> ACCTGCAATT          | No   |         |
| P25 M2 | AA <u>CGCCGGTCTT</u> ACCTGCAATT         | No   |         |
| P26    | AATTGTGGCCATAACTCGCACTGC                | No   | 421-444 |
| P27    | ACT <u>TGCTCTCGTTTTT</u> AAGAT          | Yes  | 440-459 |
| P27 M1 | ACT <u>TGCTCTCCTAGTT</u> AAGAT          | No   |         |
| P27 M2 | ACT <u>ACTATCGTCTTT</u> AAGAT           | No   |         |
| P27 M3 | ACT <u>ACTATCGTTTTT</u> AAGAT           | No   |         |
| P28    | GTTTTTAAGATCCGTTTGT                     | No   | 449-467 |
| P29    | TTTGTGGTGGTTGTT <u>IGTCCGCGAT</u> GGCAT | Yes  | 463-493 |
| P29 M1 | TTTGTGGTGGTTGTT <u>ATCAGCGAC</u> GGCAT  | Yes  |         |
| P30    | GGCATTACGTTTTTACGAGC                    | No   | 489-509 |
| P31    | ACGAGCTCGTTCCTTCGGGTCCA                 | No   | 504-526 |

\*The TAGteam sequence is underlined. Numbers refer to nucleotide position with respect to the minimal eve 3+7 enhancer tested in vivo and reported in Fig. S4.

<sup>†</sup>Numbers refer to the nucleotide position with respect to the minimal eve 2 enhancer tested in vivo, which spans from the *Bst*II site on the 5' side to the *Bss*III site on the 3' side (i.e. nucleotides 1-489).

<sup>‡</sup>The putative Zelda binding sites are underlined. Numbers are as above.

<sup>§</sup>Knirps binding sites are in blue. Tested mutations are in red. Numbers refer to the nucleotide position with respect to the minimal eve 3+7 enhancer tested in vivo and reported in Fig. S4.
