# Supplementary figures and images for: Combinatorial activation and concentration-dependent repression of the Drosophila even skipped stripe 3+7 enhancer
Source: Oxford University Press journal article supplement (doi:10.1242/dev.065987), 2011-08-25

**A**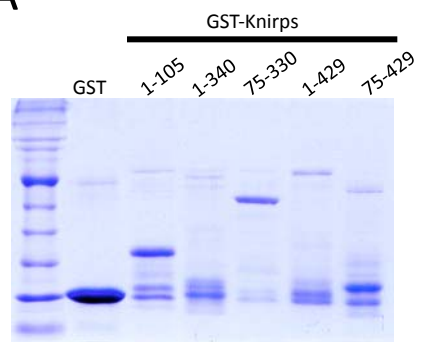**B**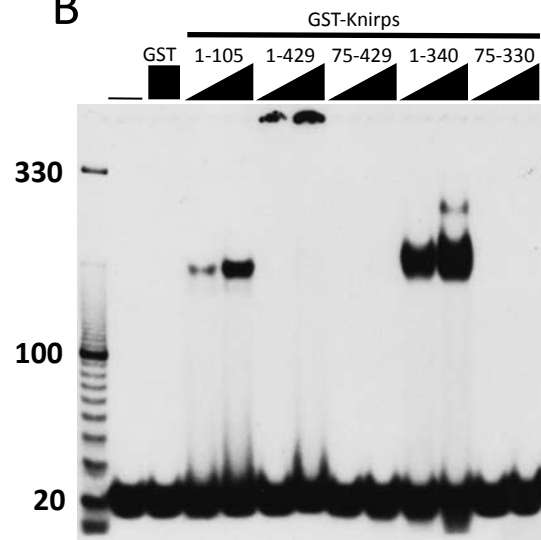**C**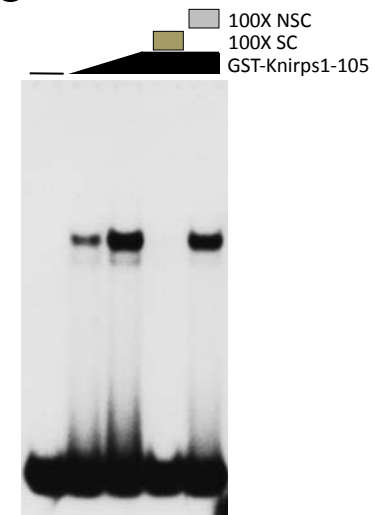

Supplement: dev065987figs2.pdf [file dev065987figs2.pdf]

WT

*zld* M<sup>-</sup>

NC 13

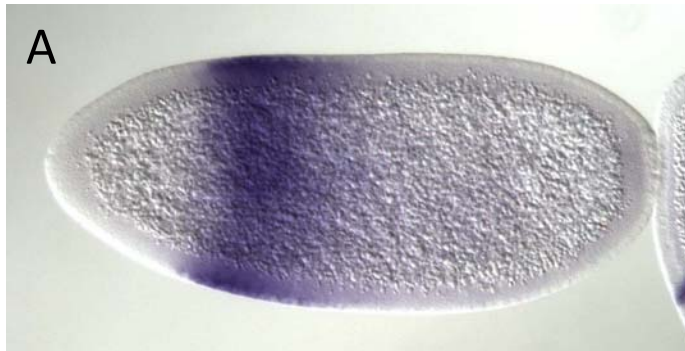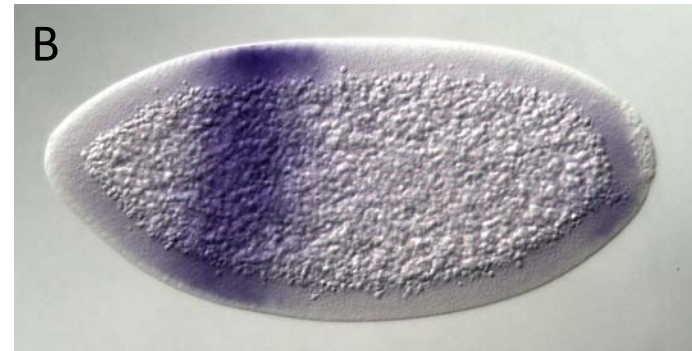

Early  
NC 14

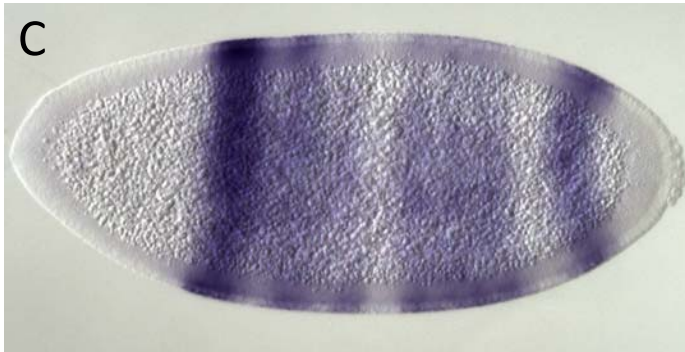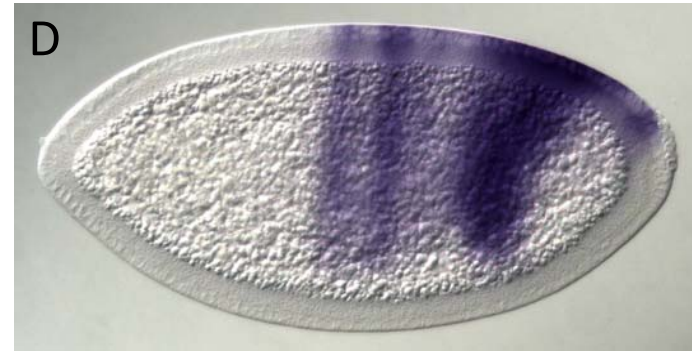

Mid  
NC 14

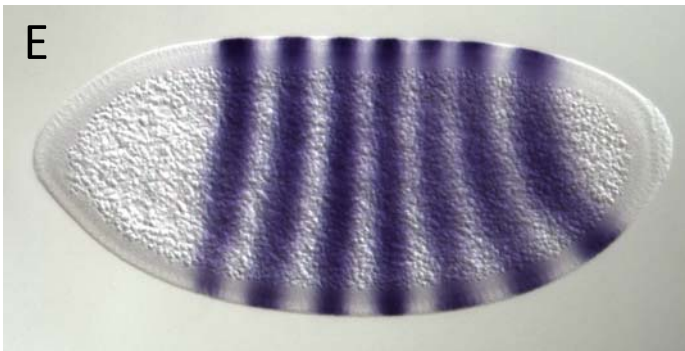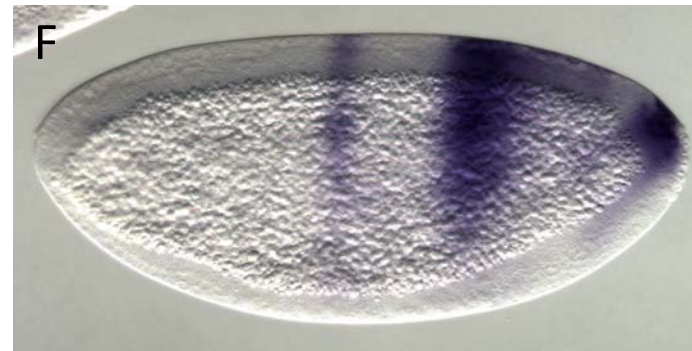

Supplement: dev065987figs3.pdf [file dev065987figs3.pdf]
